# Supplementary material
Source: PubMed Central journal article supplement (PMC4702078)
Supplement: supp_115.226597_226597_suppl_data.pdf [file supp_115.226597_226597_suppl_data.pdf]

**Title:** VU0477573: Partial negative allosteric modulator of the subtype 5 metabotropic glutamate receptor with *in vivo* efficacy

**Authors:** Hilary Highfield Nickols, Joannes P. Yuh, Karen J. Gregory, Ryan D. Morrison, Brittney S. Bates, Shaun R. Stauffer, Kyle A. Emmitte, Michael Bubser, Weimin Peng, Michael T. Nedelcovych, Analisa Thompson, Xiaohui Lv, Zixiu Xiang, J. Scott Daniels, Colleen M. Niswender, Craig W. Lindsley, Carrie K. Jones, P. Jeffrey Conn

**Supplemental Figure 1. Simulating negative allosteric modulators of mGlu<sub>5</sub> with weak negative cooperativity.** **A)** The operational model of allosterism was used to model the expected results from interactions between VU0477573 and glutamate using the phosphoERK1/2 assay. In this simulation  $\tau_A$ ,  $n$ ,  $E_m$ , basal and  $K_A$  values were taken from previously published data (Gregory et al., 2012),  $\alpha$  ( $\alpha$ ) was assumed to equal 1. If VU0477573 has the same  $K_B$  and  $\beta$  constants as calculated from Figure 1C, Table 1, then complete abolishment of the glutamate response is predicted. **B)** Plotting the predicted EC<sub>80</sub> inhibition curve from the pERK1/2 simulation in A as well as a simulation of the calcium mobilization data where the glutamate  $\tau_A = 0.5677$  as estimated from Figure 1C. Based on the  $K_B$  and  $\beta$  constants derived for VU0477573, the inhibition curve for pERK1/2 (open circles) is predicted to be more potent (pEC<sub>50</sub>: 8.3) and achieve complete blockade as compared with that observed in the calcium assay (closed circles; pEC<sub>50</sub>: 7.52, bottom plateau: 22%). **C)** Exploring the relationship between negative cooperativity and inhibition of glutamate-mediated pERK1/2. In this simulation  $\tau_A$ ,  $n$ ,  $E_m$ , basal,  $K_B$  and  $K_A$  values are held constant as for panel A, the effect of 10  $\mu$ M of NAM with varying degrees of cooperativity is demonstrated.

**Supplemental Figure 2: Calculating [<sup>3</sup>H]-mPEPy occupancy.** A) Excluding bad tail vein injections (low to no radiation counts) and values >2 SD from the mean for each group; To obtain Occ<sub>50</sub>, nonlinear regression was performed in Graphpad Prism using log(inhibitor) vs. response (three parameters); B) Excluding bad tail vein injections (low to no radiation counts) and values >2 SD from the mean for each group

Supplemental Figure 1

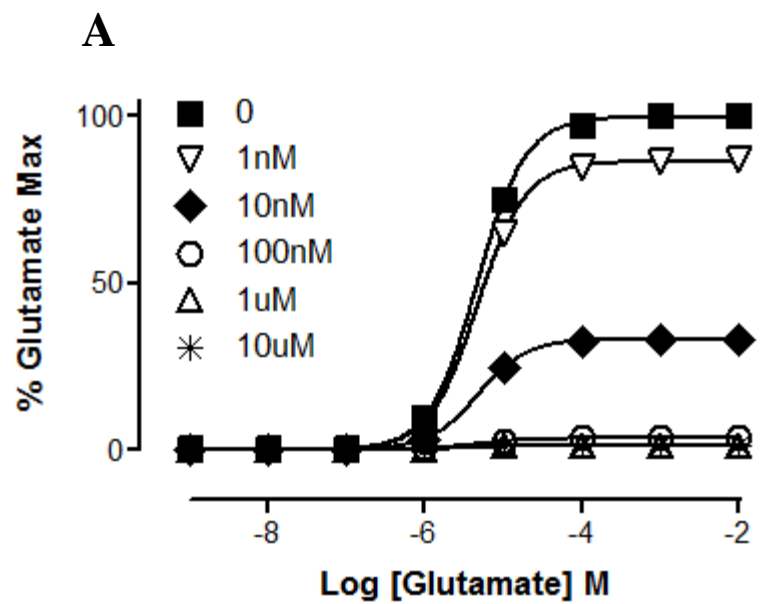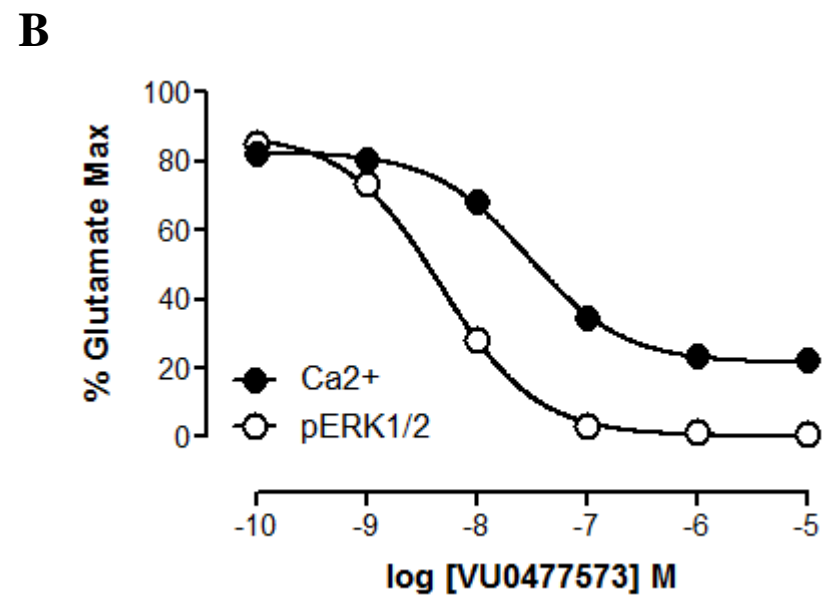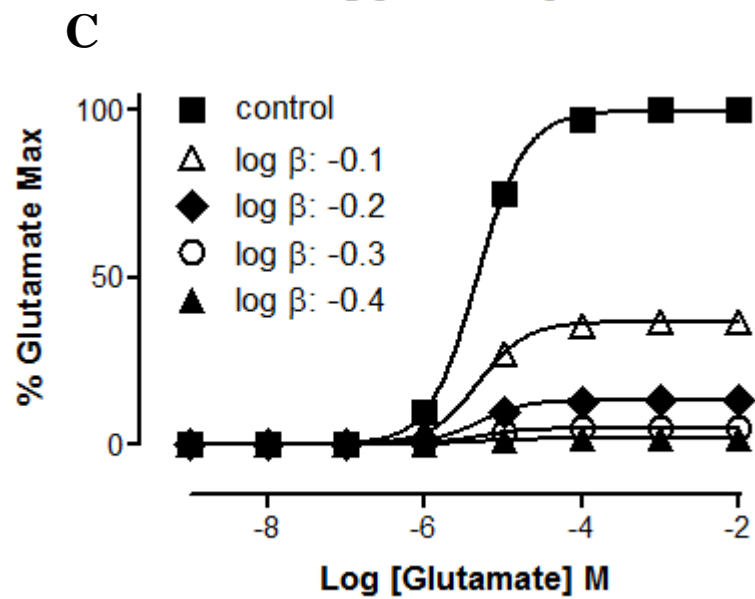

# Supplemental Figure 2

**A**

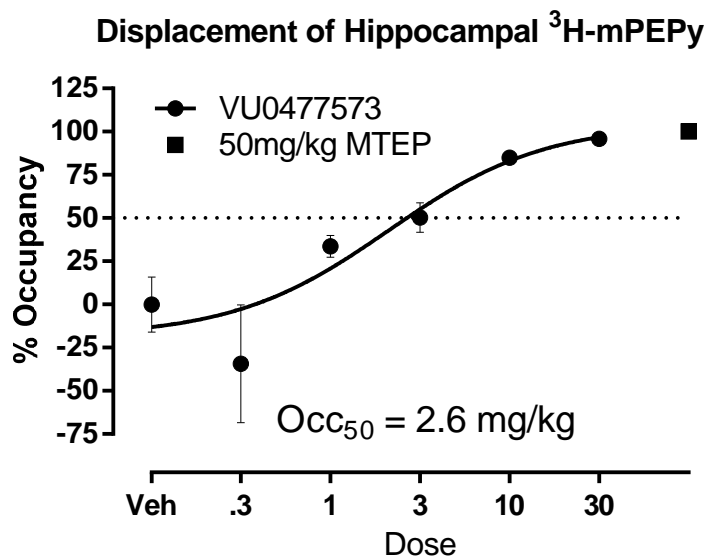

**B**

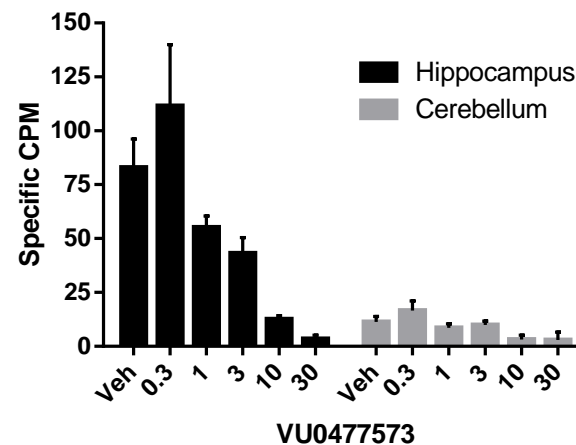

|     | Hippocampus |        |    | Cerebellum |       |    |
|-----|-------------|--------|----|------------|-------|----|
|     | Mean        | SEM    | N  | Mean       | SEM   | N  |
| Veh | 82.989      | 13.220 | 10 | 11.304     | 2.568 | 10 |
| 0.3 | 111.536     | 28.343 | 7  | 16.540     | 4.515 | 8  |
| 1   | 55.131      | 5.265  | 9  | 8.544      | 1.851 | 9  |
| 3   | 43.214      | 7.243  | 6  | 9.964      | 1.722 | 7  |
| 10  | 12.536      | 1.651  | 7  | 3.228      | 1.942 | 8  |
| 30  | 3.464       | 1.668  | 8  | 2.915      | 3.685 | 8  |
